# Supplementary material for: Starburst amacrine cells amplify optogenetic visual restoration through gap junctions
Source: bioRxiv or medRxiv preprint supplement (doi:10.1101/2020.08.11.246686), 2022-06-19
Supplement: Supplementary file [file media-1.pdf]

- 1 **Supplemental Information for**
- 2 **Starburst amacrine cells amplify optogenetic visual restoration through**
- 3 **gap junctions in the murine retina**
- 4 Katada Y et al.
- 5
- 6

## 7 Supplemental Figures

## 8 Figure S1. KENGE-tet system and tetO-Yellow cameleon

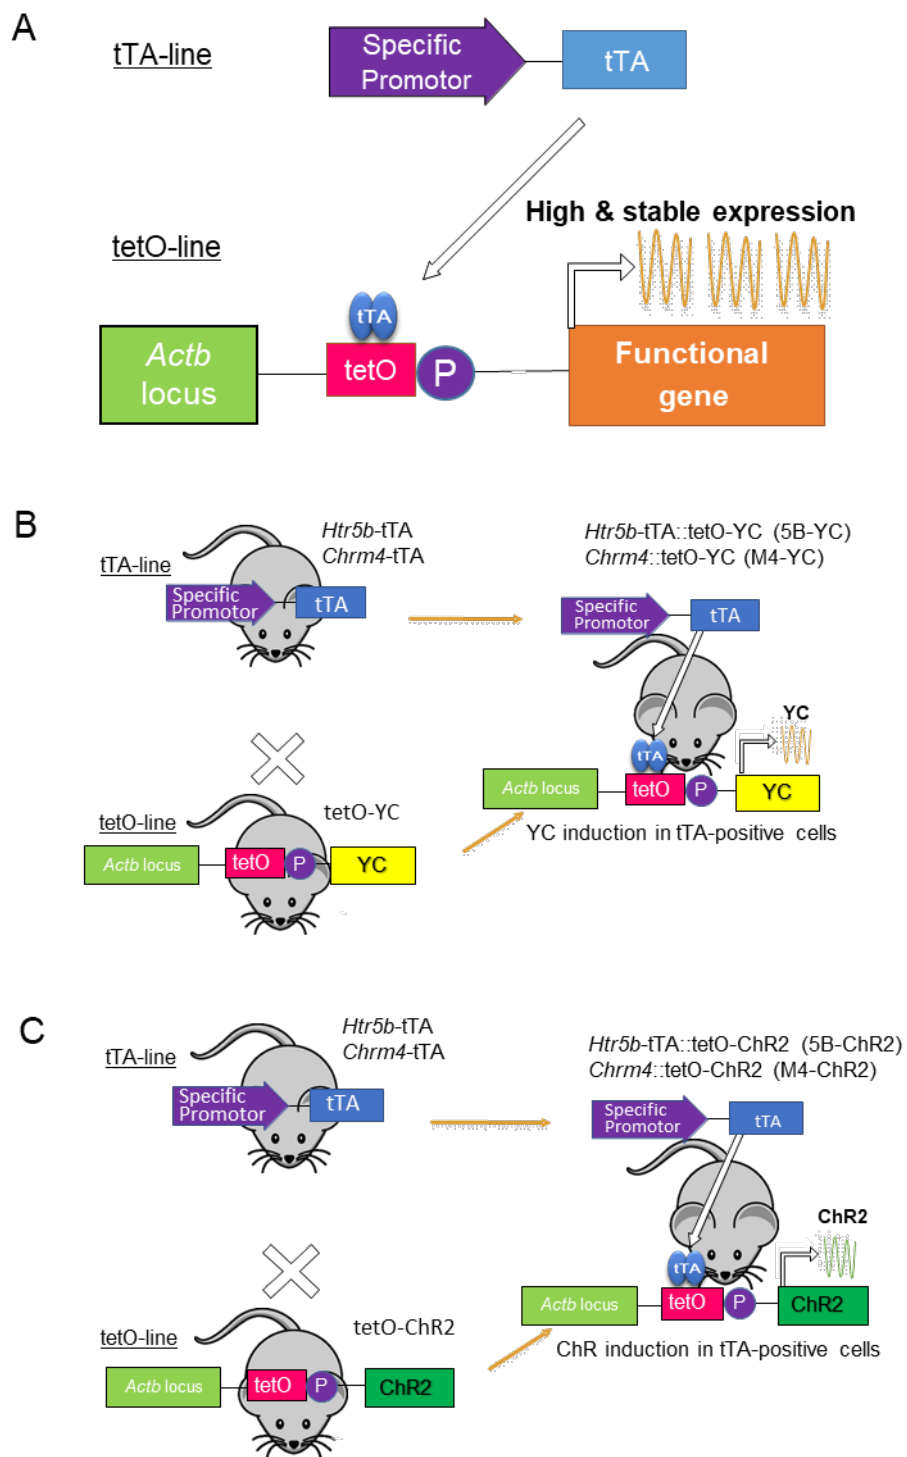

10 (A) KENGE-tet system. tTA is expressed under the control of cell type-specific promoters.  
11 tTA transactivates the tetO promoter, and the functional protein is induced in a cell-type-  
12 specific manner. (B, C) Two different mouse lines are employed that express the gene  
13 encoding tTA protein under the control of a cell-type-specific promoter, muscarinic  
14 acetylcholine receptor M4 or serotonin receptor 5B control region. These mice were further  
15 crossed with another transgenic mouse line containing a YC fluorescent gene connected into  
16 the downstream of the tetO promoter. The YC gene expression was induced only by the  
17 presence of tTA protein in the double transgenic mice (M4-YC or 5B-YC)(B). Next, as a  
18 visual restoration model, the tTA line was crossed with tetO-ChR2. (C) tTA drove ChR2  
19 expression in RGC.

20

21 **Figure S2. Expression of Yellowameleon in M4-YC and 5B-YC**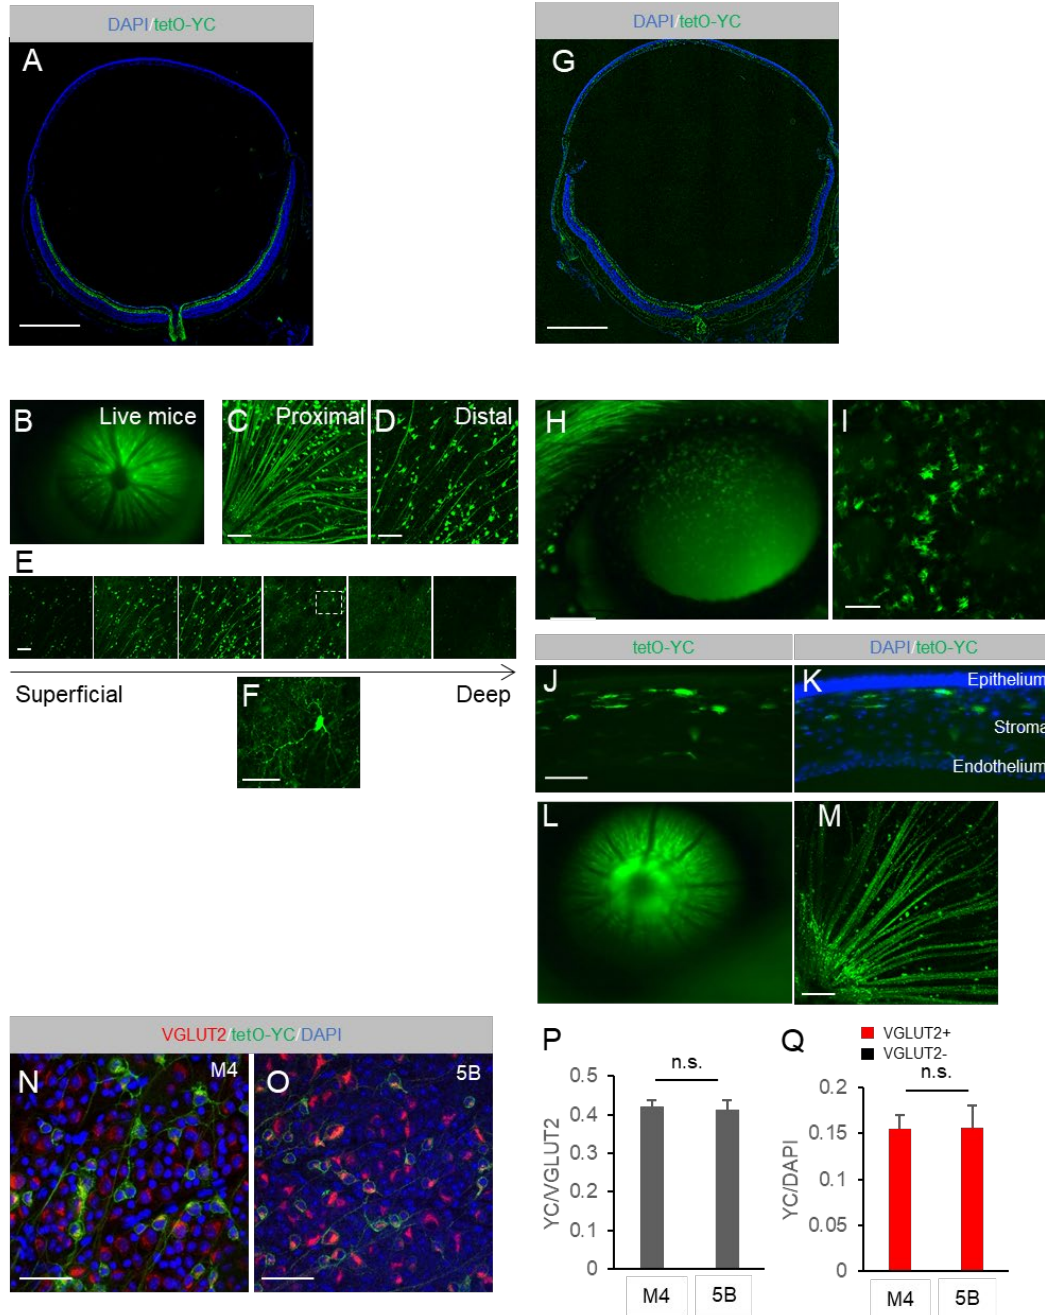

22

23

24 In the M4-YC mouse retina, we identified the expression of YC (green) in RGC and  
25 amacrine cells within sections (A), with in vivo fluorescence microscopy (B), and with flat  
26 mounted retina (C-F). In the 5B-YC mouse retina, we identified the expression of YC in  
27 RGC and the corneal stromal layer with in sections (G, J, K), in vivo fluorescence  
28 microscopy (H, I, L), and the flat mounted retina (M). Coexpression of the RGC marker  
29 VGLUT2 in flat mounted retina of M4-YC (N) and 5B-YC (O). Percentage of YC-positive  
30 cells in VGLUT2-positive (P) or DAPI-positive cells (Q) and VGLUT2-positive cells in  
31 YC-positive cells (Q) in both lines from confocal flat mounted GCL (n = 3 retinas each).  
32 Regions were chosen in each quadrant, and we obtained VGLUT2, DAPI-positive, YC-  
33 positive, and co-labeled cells. Error bars represent the SEM. Scale bar: 50  $\mu\text{m}$  in (F), (N)  
34 and (O). 100  $\mu\text{m}$  in (C-E), (I), (J) and (M). 1,000  $\mu\text{m}$  in (A) and (G).

35

36 **Figure S3. Immunostaining of amacrine cells in M4-YC mice**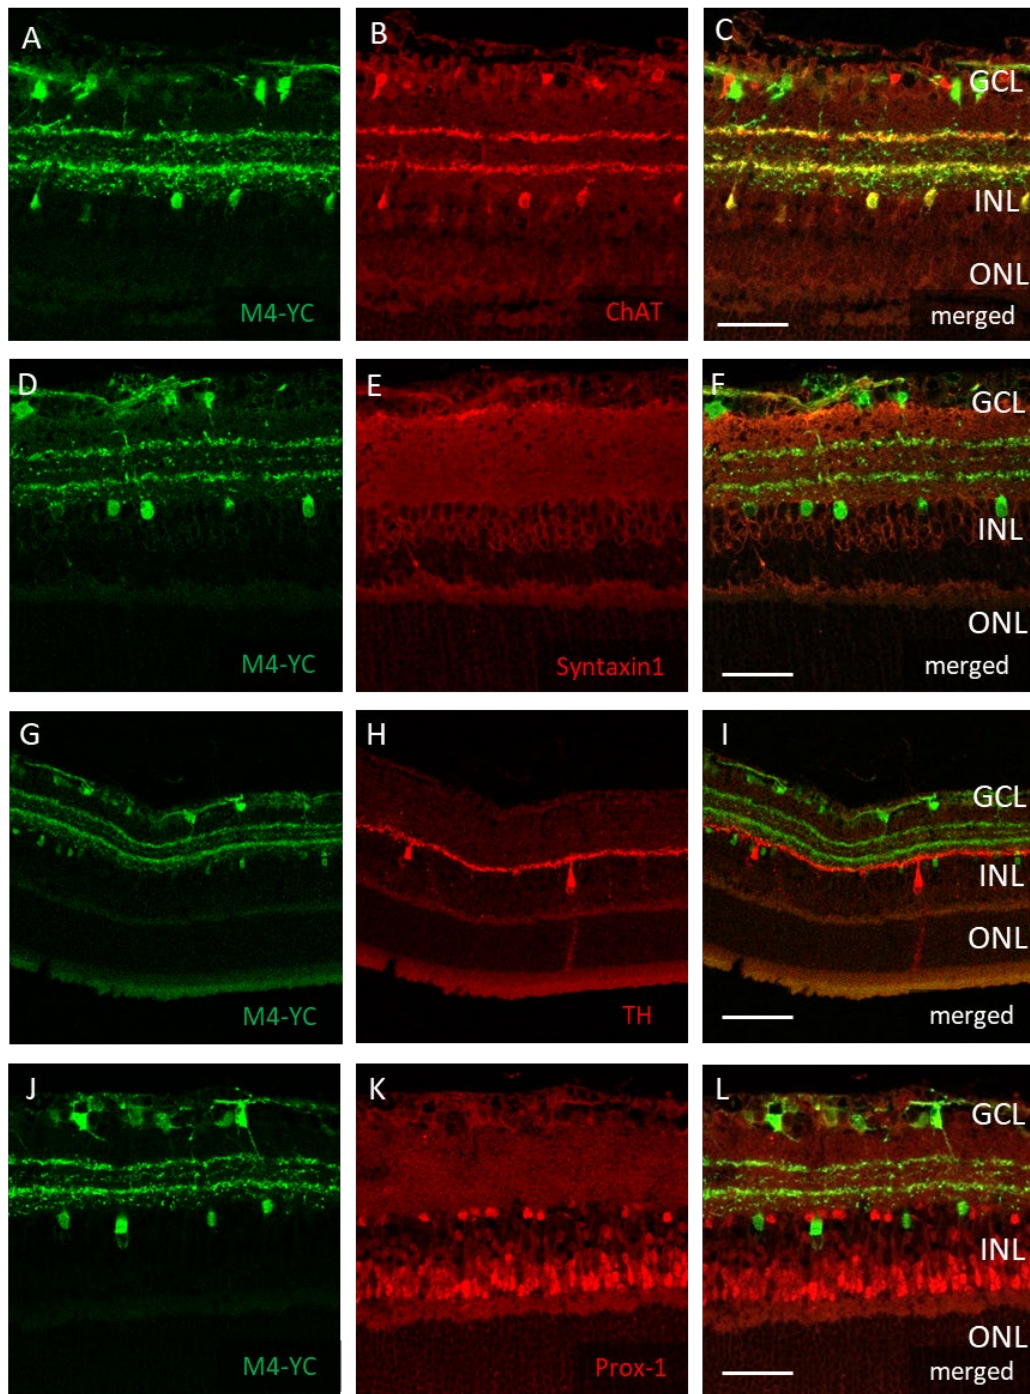

37

38 Immunohistochemistry on the transverse retinal cryosection of M4-YC mouse labeled  
 39 with choline acetyltransferase (ChAT), a starburst amacrine marker (A-C), syntaxin1, a  
 40 pan-amacrine cell marker (D-F), tyrosine hydroxylase (TH), a dopaminergic amacrine

41 marker (G-H) and Prox-1, an All amacrine marker (J-L). GCL, ganglion cell layer; INL,  
42 inner nuclear layer; ONL, outer nuclear layer. Scale bars, 50  $\mu\text{m}$  in A-L.  
43

44 **Figure S4. The maintained response was retained regardless of photoreceptor degeneration in**  
 45 **M4-ChR2/M4-ChR2 mice.**

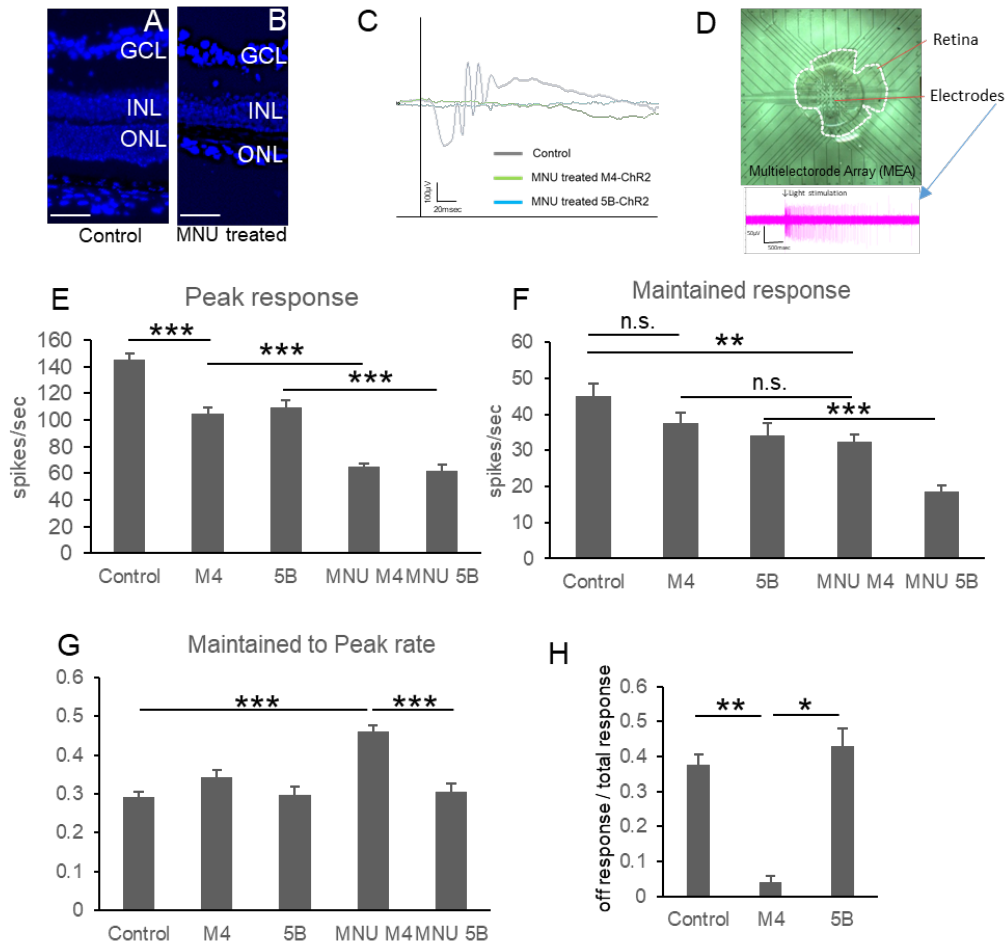

46

47 (A, B) Comparison of retinal sections after intraperitoneal administration of MNU. MNU  
 48 was used to produce a photoreceptor degeneration model. Two weeks after the MNU  
 49 injection, DAPI nuclear counter-stain is shown in blue. Scale bar: 50  $\mu\text{m}$ . (C) Representative  
 50 ERG traces from MNU-injected and control mice. White LED light stimulation of 10.0 log  
 51  $\text{cd-s/m}^2$  was delivered. (D) Image of MEA. It can measure the extracellular potential of  
 52 RCGs in contact with the electrode ex vivo. (E-F) Comparison of peak response (E),



53 maintained response (F) and maintained to peak rate (G) from MEA recordings among  
54 control (tetO-ChR2; n = 3 retinas, 112 cells), M4-ChR2M4-ChR2 (n = 3 retinas, 62 cells),  
55 5B-ChR2 (n = 3 retinas, 48 cells), MNU-treated M4-ChR2M4-ChR2 (n = 3 retinas, 164  
56 cells) and MNU-treated 5B-ChR2 (n = 3 retinas, 117 cells) mice. (H) Comparison of ratio  
57 of off response to total light response from MEA recording. Error bars represent SEMs. \*p  
58 < 0.05, \*\*p < 0.01, \*\*\*p < 0.001. Games-Howell test.

59

60

61 **Figure S5. Ectopic channelrhodopsin induction had no significant effect on ERG or**  
 62 **VEP.**

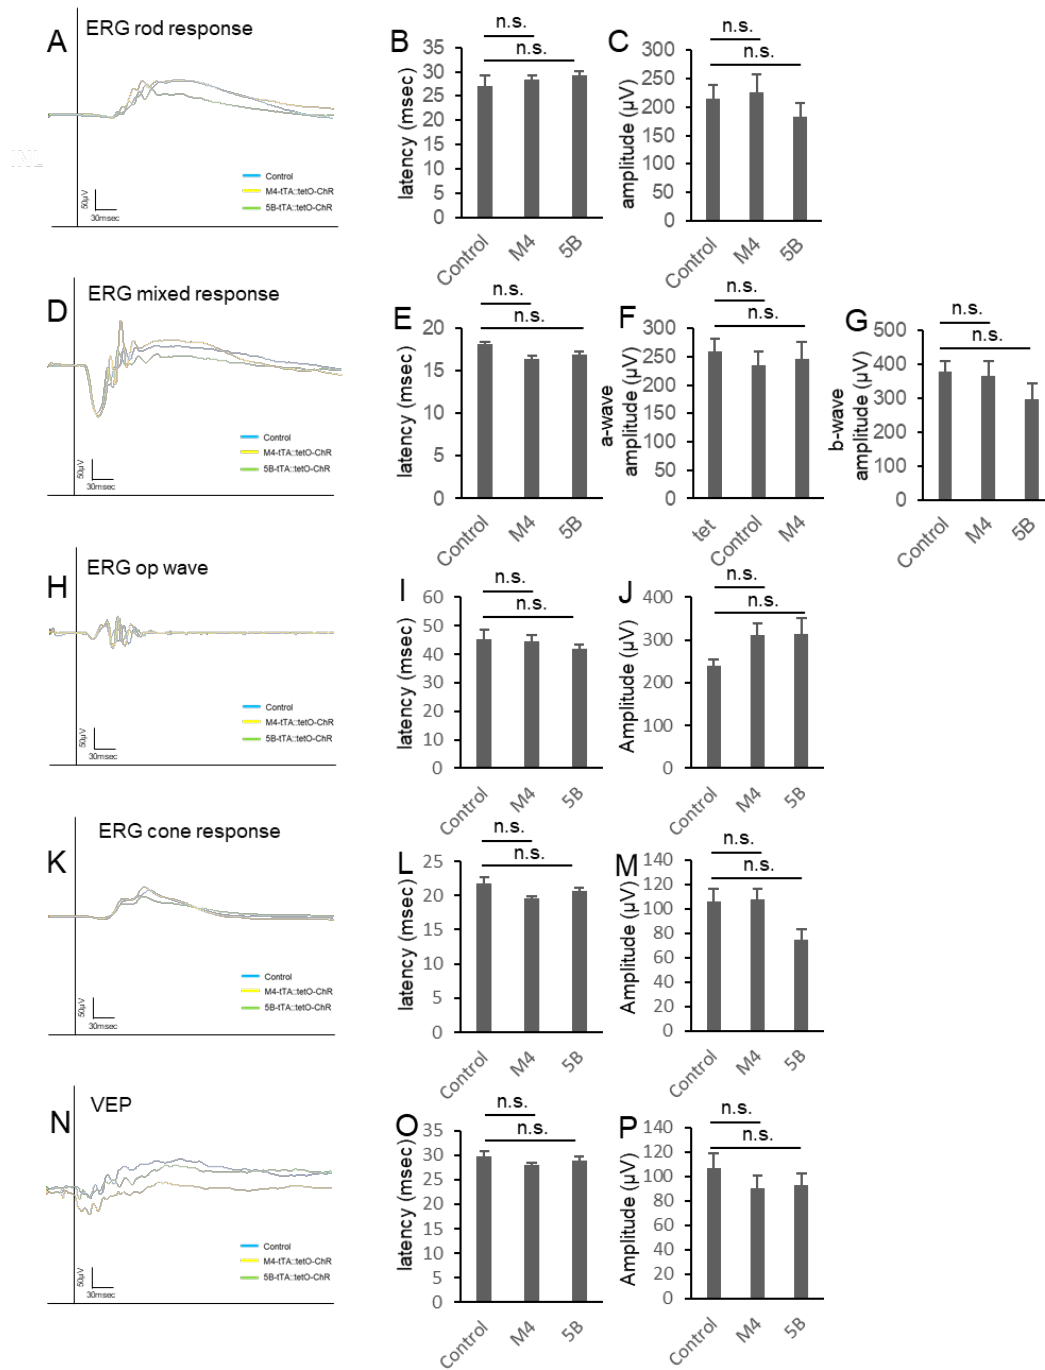

63

64 Representative ERG waveforms from ERG rod response (A), mixed response (D),  
65 oscillatory potentials (H), cone response (K) and VEPs (N). Quantification of latency  
66 (B, E, I, L, O) and amplitude (C, F, G, J, M, P) in each protocol in control (tetO-ChR2;  
67 n = 6), M4-ChR2M4-ChR2 (n = 8), and 5B-ChR2 (n = 8) mice. Error bars represent  
68 SEMs. n.s., not significant. Games-Howell test.

69 **Figure S6. Thinning of INL in the genetic model of retinal degeneration attenuating**  
 70 **the restoration effect.**

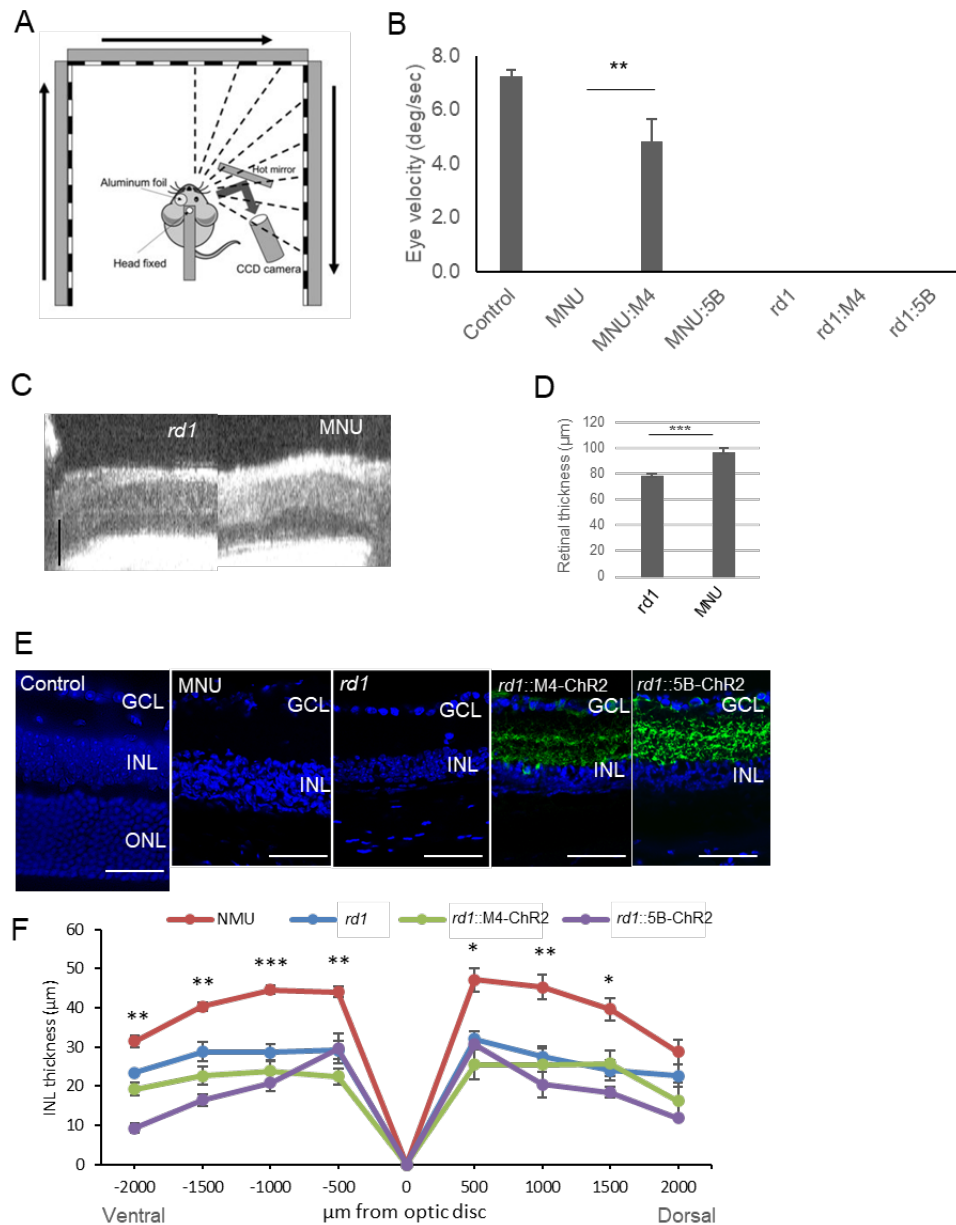

71

72 (A) Schematic view of the OKR system. The images of the right or left eyes are captured

73 by a CCD camera placed on the same side. During measurement, the contralateral eyes are

74 covered with aluminum foil. Visual stimulation is presented on three LCD monitors around  
75 the mouse, the head of which is fixed in the middle. (B) The average eye velocities of the  
76 control tetO-ChR2 mice (n = 3), MNU-injected tetO-ChR2 mice (n = 3), M4-ChR2M4-  
77 ChR2 mice (n = 9), 5B-ChR2 mice (n = 5)), *rdl*;tetO-ChR2 mice (n = 8), *rdl*;M4-ChR2M4-  
78 ChR2 mice (n = 10) and *rdl*;5B-ChR2 mice (n = 5) measured from the OKR system at 10  
79 weeks of age. (C, D) Retinal structure images of *rdl* (n = 9) and MNU (n = 10)-treated mice  
80 at 8 weeks of age by optical coherence tomography (OCT). (E) Retinal sections of control  
81 (tetO-ChR2), MNU-treated tetO-ChR2, *rdl*::tetO-ChR2, *rdl*;M4-ChR2M4-ChR2 and  
82 *rdl*;5B-ChR2 mice at 8 weeks of age. Nuclear counter-staining with DAPI (blue) and  
83 ectopic gene induction with YC (green) are shown. (F) The INL thickness quantification  
84 from the sagittal sections. Cryosections from MNU-treated tetO-ChR2 (n = 6), and  
85 *rdl*::tetO-ChR2 mice (n = 6) at 8 weeks of age and *rdl*;5B-ChR2 (n = 3) and *rdl*;M4-  
86 ChR2M4-ChR2 (n = 3) mice at 10 weeks of age were used for quantification.

87 All scale bars: 50  $\mu$ m. All error bars represent the SEMs. \*p < 0.05, \*\*p < 0.01, \*\*\*p <  
88 0.001. Student's 2-tailed t-test or Tukey's test.

89

90 **Figure S7. Gap junction was involved in the maintained response.**

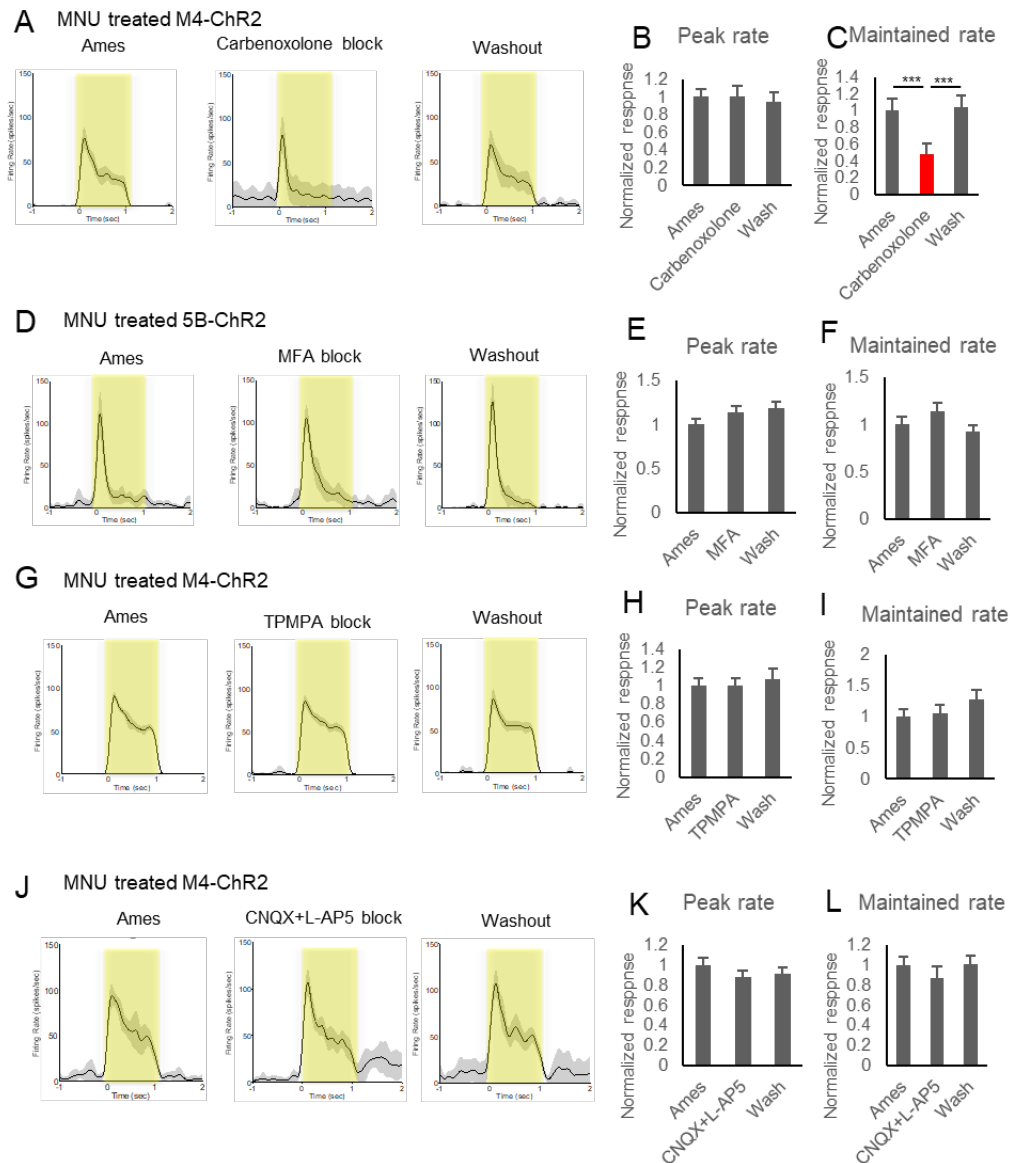

91

92 (A, D, G, J) Mean  $\pm$  SEM of exemplar cell response firing rate recorded during normal

93 Ames' medium superfusion (left), in synaptic block (middle), and after washout (right).

94 MNU-treated M4-ChR2M4-ChR2 mice with carbenoxolone block (n=3 retinas, 25 cells)

95 (A), MNU-treated 5B-ChR2 mice with MFA block (n=3 retinas, 117 cells) (D), MNU

96 treated M4-ChR2M4-ChR2 mice with TPMPA block (n=3 retinas, 51 cells) (G), and MNU  
97 treated M4-ChR2M4-ChR2 mice with CNQX and L-AP5 block (n=3 retinas, 52 cells) (J).  
98 The gray areas around the averaged traces represent the SEM. (B, C, E, F, H, I, K, L)  
99 Averaged normalized peak firing rate and maintained rate. Maintained time frame is 0.4 to  
100 1.0 seconds from light stimulation. Light intensity was 13.6 log photons/cm<sup>2</sup>/s.  
101 All error bars represent the SEMs. \*\*\*p < 0.001. One-way ANOVA and Tukey's test.  
102

103 **Figure S8. Visual restoration profile of rAAV model**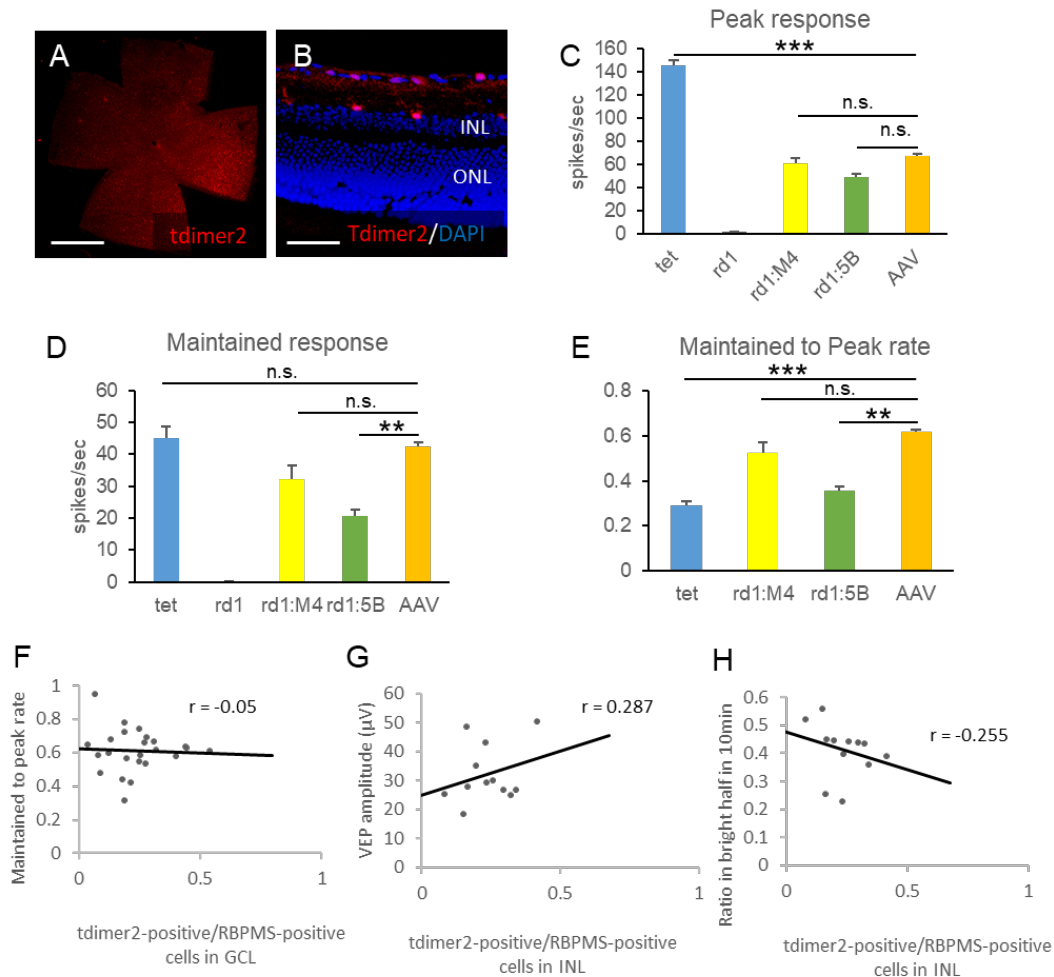

104

105 (A) AAV2-CAG-tdimer2-WPRE intravitreally injected mouse flat mounted retina and

106 its section. (C-E) Comparison of peak response (C), maintained response (D) and

107 maintained to peak rate (E) from MEA recordings among control (tetO-ChR2; n = 3

108 retinas, 112 cells), *rd1::tetO-ChR2* (n = 3 retinas, 86 cells), *rd1;M4-ChR2M4-ChR2* (n109 = 3 retinas, 18 cells), *rd1;5B-ChR2* (n = 3 retinas, 17cells) and rAAV treated *rd1::tetO-*



110 Chr2 mice (n = 24 retinas, 1,151 cells) at 10 weeks of age. (F-H) Correlation between  
111 transfection efficiency into RGCs (tdimer2-positive cells/RBPMS-positive cells in INL)  
112 and maintained to peak rate (F) (n = 24), VEP amplitude (G) (n = 24) and % time in  
113 bright half in LDT (H) (n = 12). All error bars represent the SEMs. INL, inner nuclear  
114 layer; GCL, ganglion cell layer, RGC, retinal ganglion cell, ONL, outer nuclear layer.  
115 Scale bars, 1,000  $\mu\text{m}$  in (A), 50  $\mu\text{m}$  in (B), n.s.: not significant, \* $p < 0.05$ , \*\* $p < 0.01$ ,  
116 \*\*\* $p < 0.001$ . Games-Howell test (C, D, E), Pearson's correlation coefficient (F-H).
